# Supplementary material for: Impact of climate change on photochemical air pollution in Southern California
Source: Copernicus journal article supplement (doi:10.5194/acp-9-3745-2009), 2009-06-10
Supplement: Supplementary file 1 [file acp-9-3745-2009-supplement.pdf]

**Supplemental Table 1:** Average weekday 8-h ozone (ppb) at 1000 h – 1800 h LT (local time): base case levels and differences between specified run and base case.

|                          | Anaheim | Central L.A. | Pomona | Riverside | Palm Springs |
|--------------------------|---------|--------------|--------|-----------|--------------|
| Base case O <sub>3</sub> | 40.5    | 31.2         | 48.6   | 79.3      | 91.0         |
| 1) Temperature           | +1.1    | +0.8         | +1.3   | +2.4      | +1.9         |
| 2) Biogenic VOC          | +0.6    | +0.9         | +2.4   | +3.3      | +0.9         |
| 3) Humidity              | +0.3    | +0.7         | +2.6   | +4.2      | -0.6         |
| 4) 2050 Emissions        | +2.5    | +6.3         | +1.9   | -12.9     | -7.3         |
| 5) Inflow BC             | +4.3    | +3.9         | +4.3   | +5.0      | +1.0         |
| 6) Combined 1-3          | +2.2    | +2.5         | +6.8   | +10.4     | +2.3         |
| 7) Combined 4-5          | +7.2    | +10.8        | +6.6   | -8.4      | -6.2         |
| 8) Combined 1-5          | +9.1    | +13.0        | +12.9  | -1.7      | -4.3         |

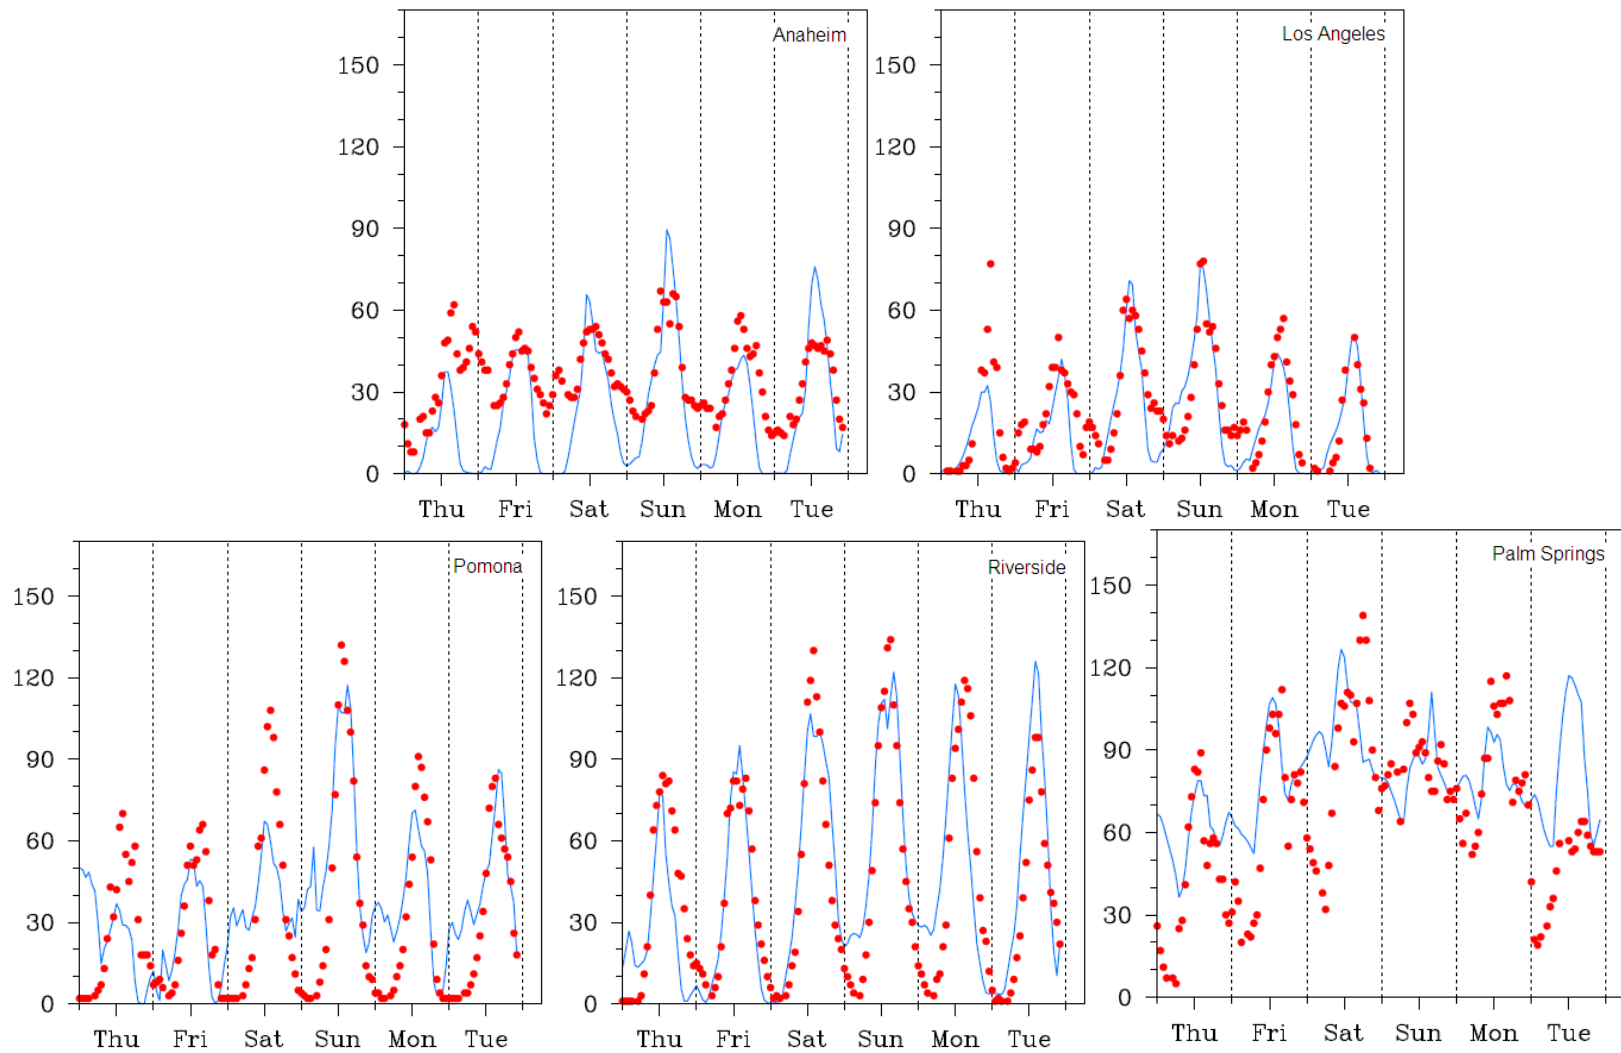

**Supplemental Figure 1:** Comparison of base case model output (blue) to ozone measurements (red) at five sites.

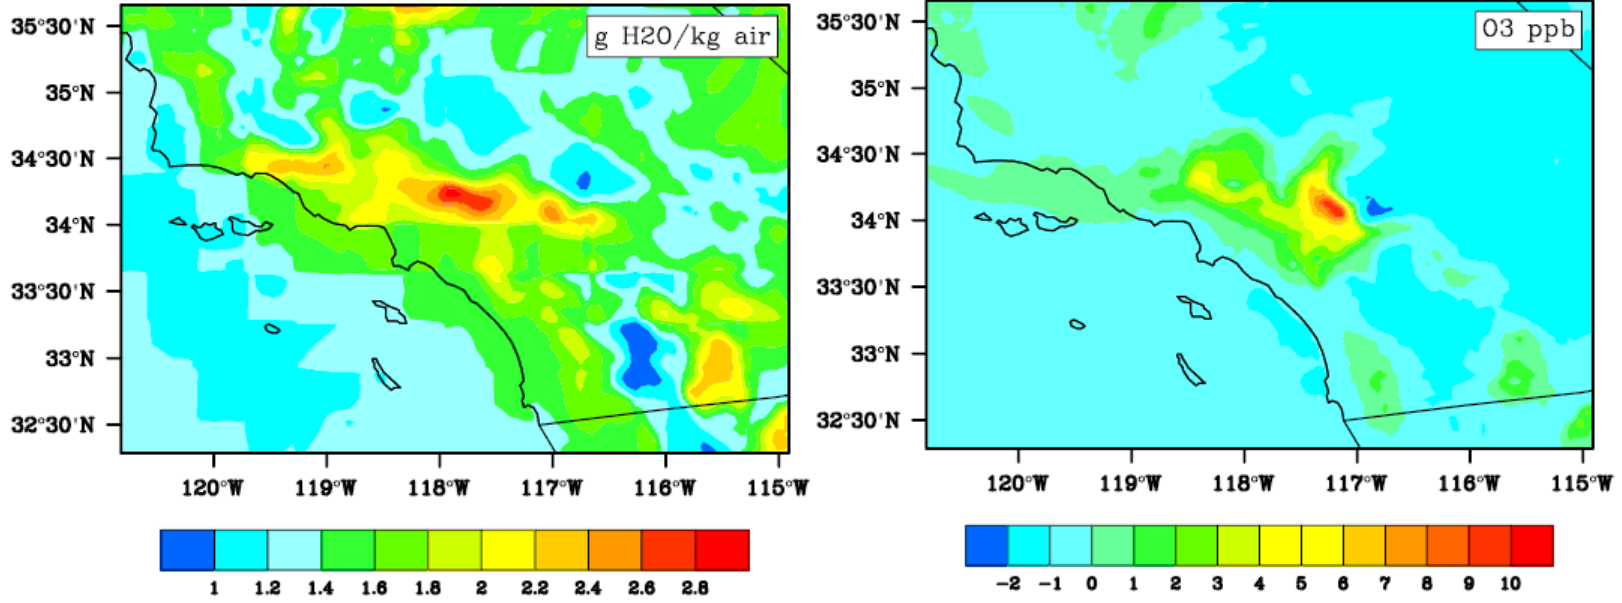

**Supplemental Figure 2:** Difference between future and base case absolute humidity and ozone concentrations on weekdays at 1500.

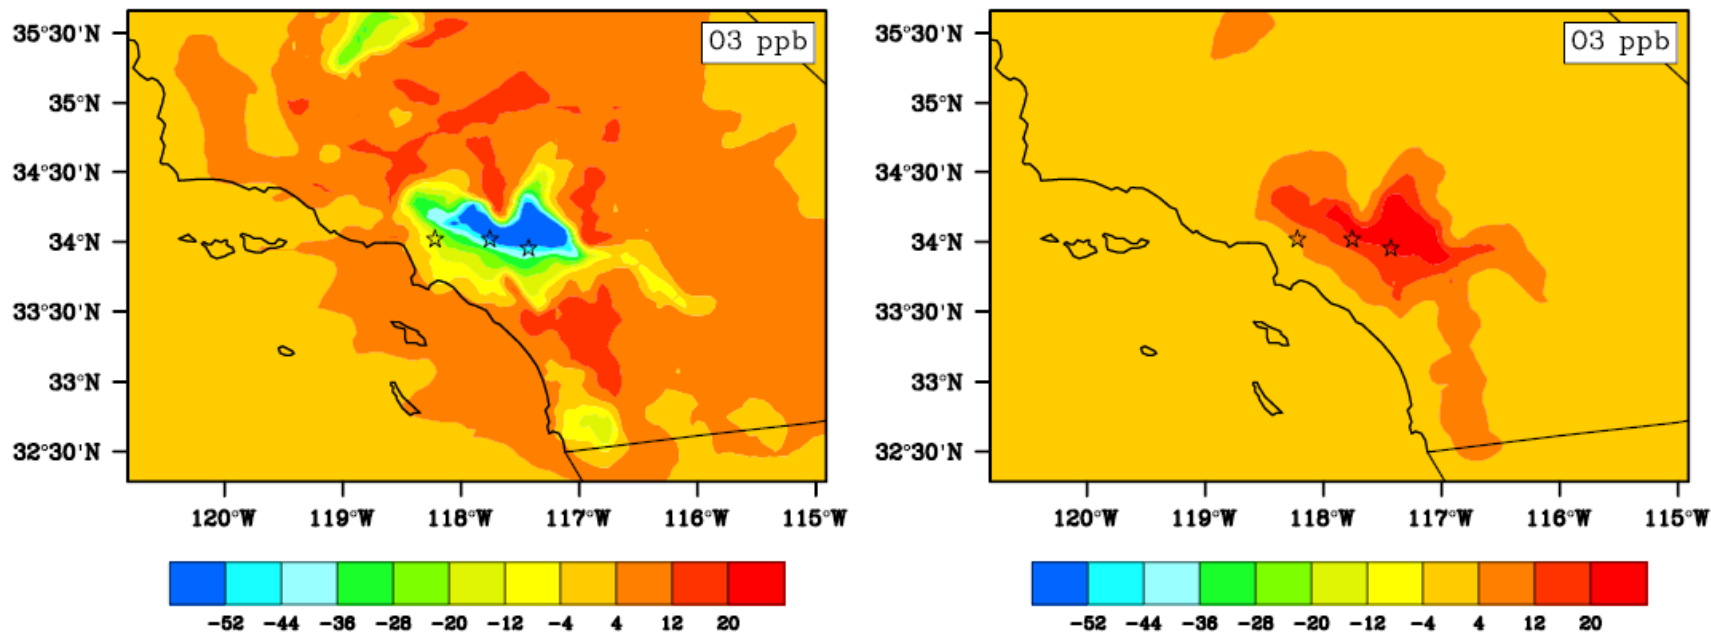

**Supplemental Figure 3:** Peak ozone semi-normalized sensitivity to NO<sub>x</sub> (left) and VOC (right).

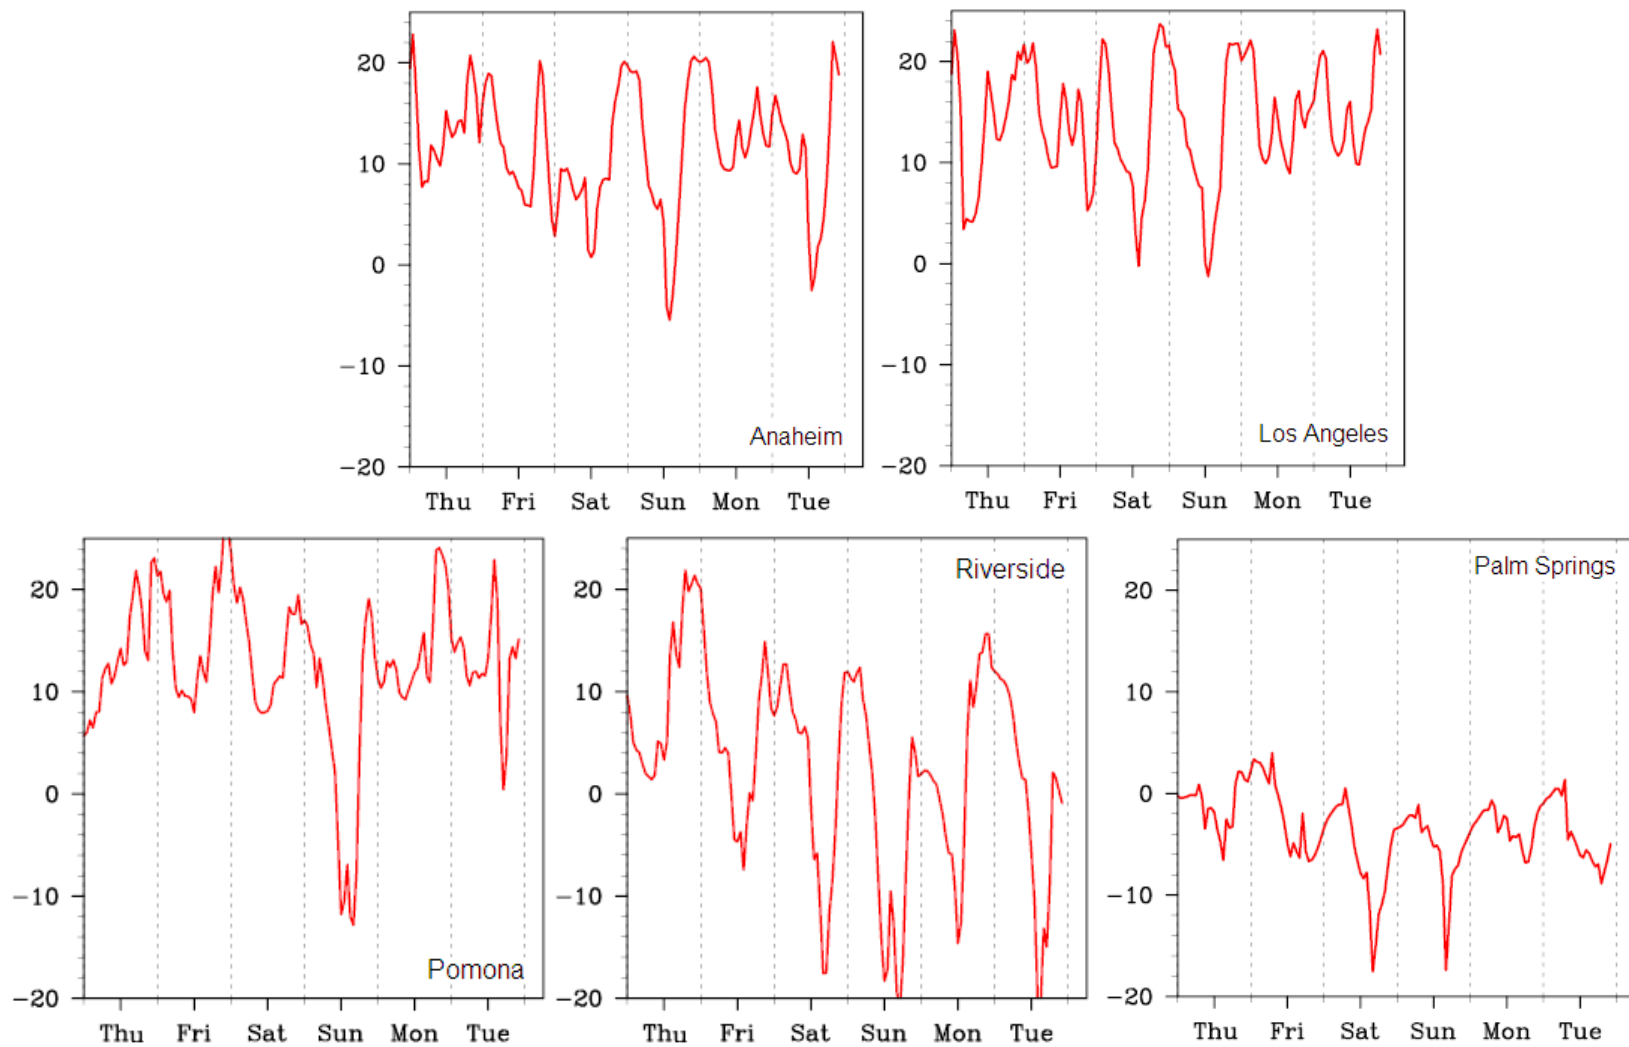

**Supplemental Figure 4:** Difference between base case and future ozone concentrations (ppb) by time at five locations. (All perturbations scenario).

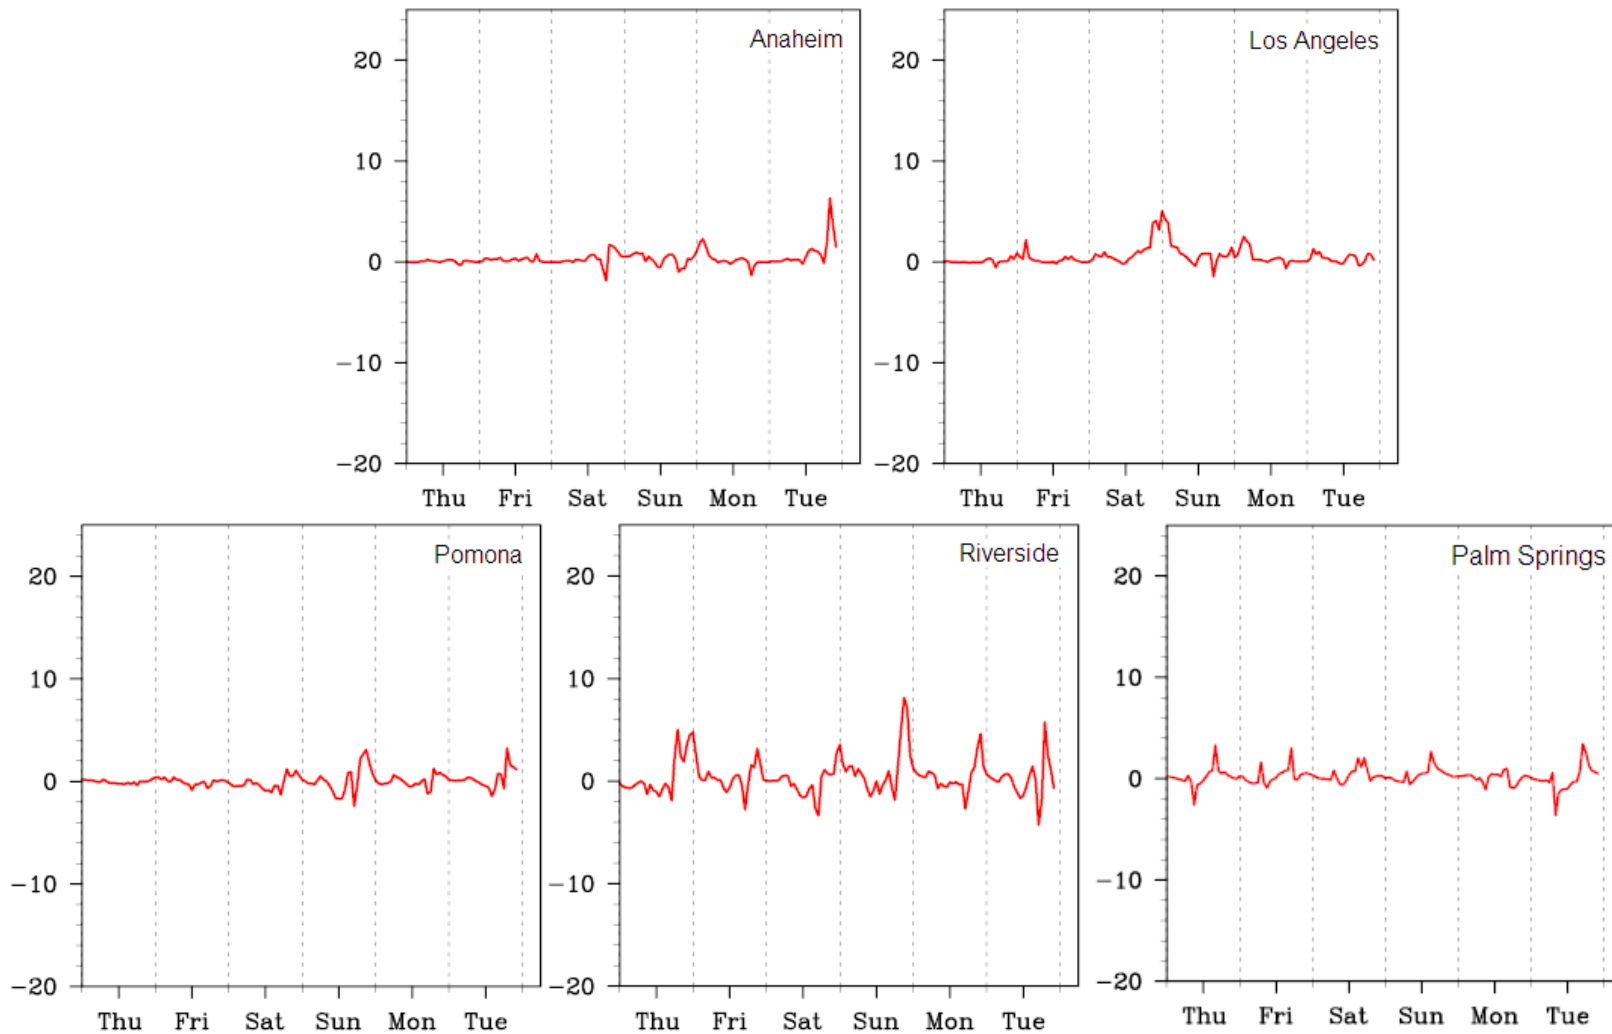

**Supplemental Figure 5:** Difference between base case and future ozone concentrations (ppb) by time at five locations. (Future temperature scenario with future temperature change adjusted by time of day).

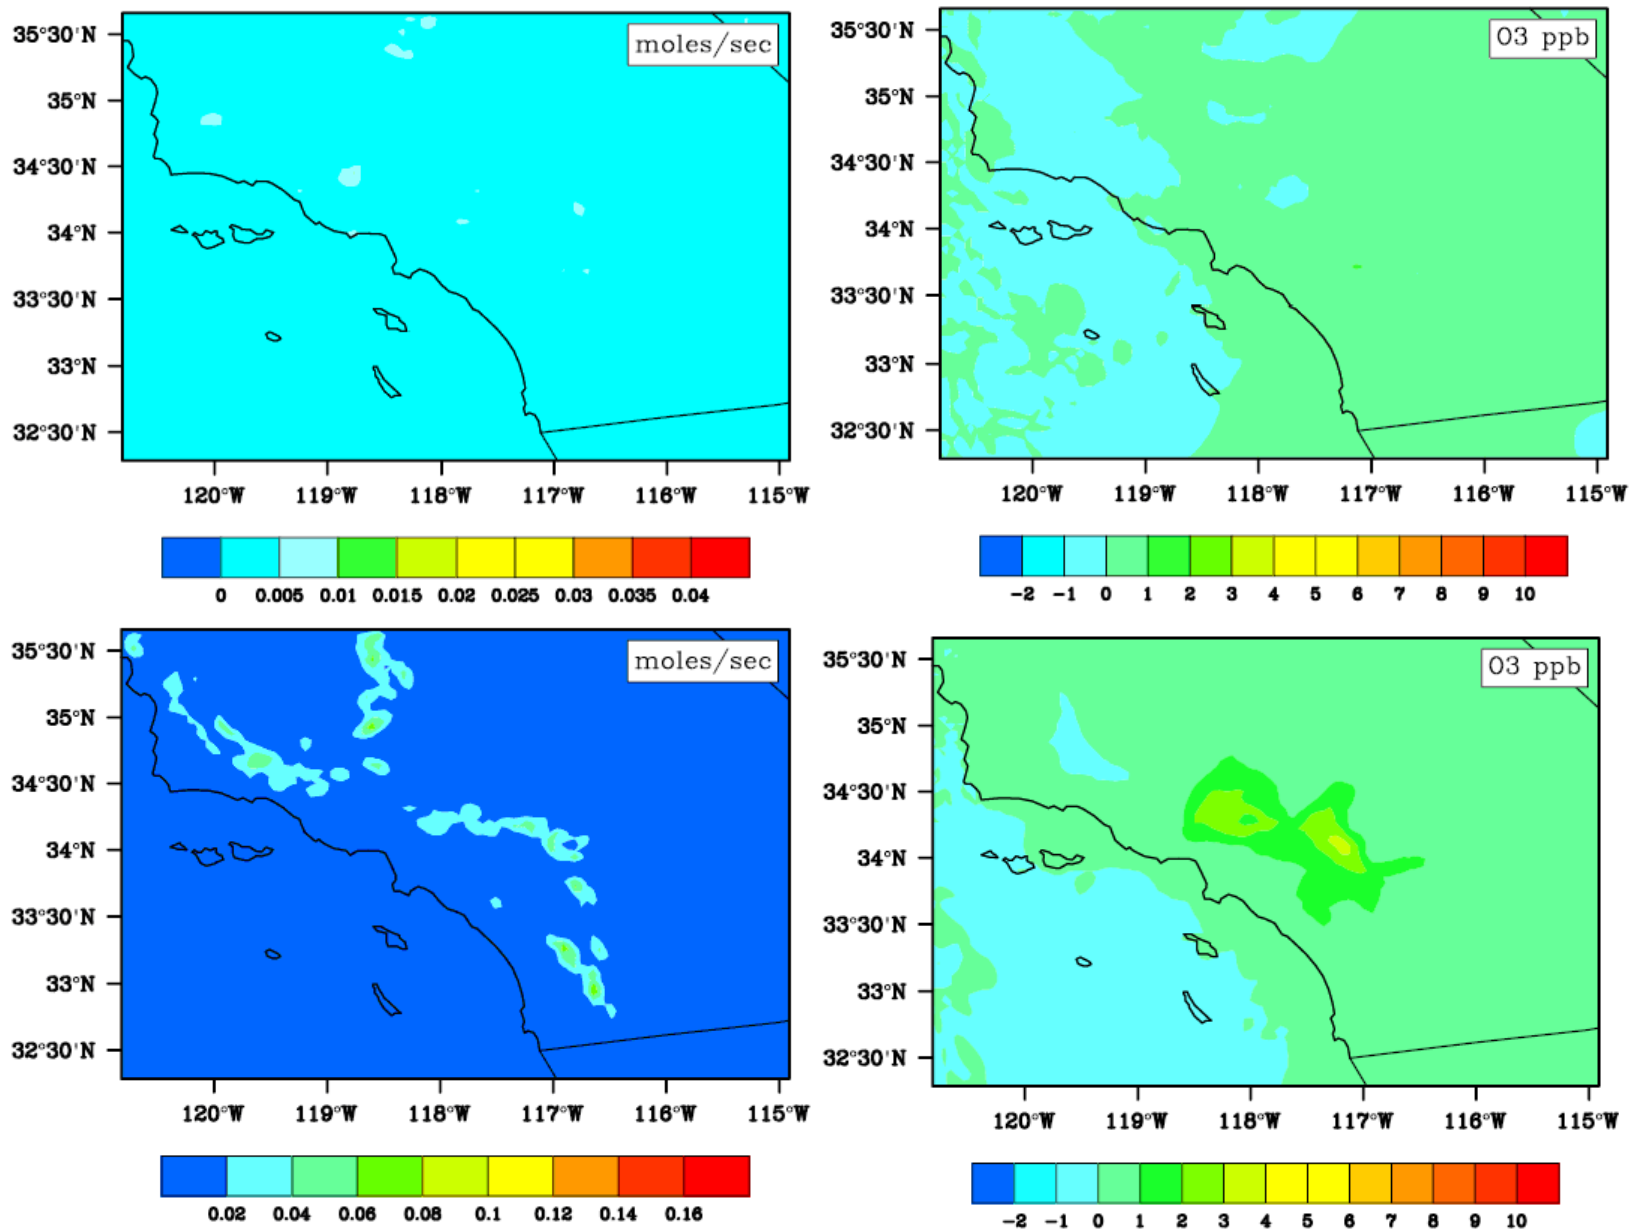

**Supplemental Figure 6:** Difference between future and base case biogenic emissions and ozone concentrations on weekdays at 300 (top panels) and 1500 (bottom panels). Biogenic emissions in the scenario are based on temperature changes that have been adjusted by time of day.
